# Supplementary material
Source: MDPI journal article supplement (https://www.mdpi.com/2039-4403/14/2/62)
Supplement: s1 [file s1]

## Supplementary files

**Table S1.** Semi-structured ARES-AP focus group guide

|                                                                                                                  |
|------------------------------------------------------------------------------------------------------------------|
| <b>Could you tell us what you think of the ARES-AP programme?</b>                                                |
| Could you describe the main advantages of this programme? And the main barriers?                                 |
| What do you think of the different ARES-AP plans proposed for the care of people with chronic health conditions? |
| What motivates nurses to work with the ARES-AP plans?                                                            |
| What improvements do you think could be made to the ARES-AP programme?                                           |
